# Supplementary material
Source: MDPI journal article supplement (https://www.mdpi.com/2039-4713/13/1/5)
Supplement: s1 [file s1]

Table S1. Search strategy in this article.

| P                                                                                                                                                                                                                                                                                                                                                                                                                         | I                                 | C | O | S |
|---------------------------------------------------------------------------------------------------------------------------------------------------------------------------------------------------------------------------------------------------------------------------------------------------------------------------------------------------------------------------------------------------------------------------|-----------------------------------|---|---|---|
| "Purpura, Thrombocytopenic, Idiopathic"[Mesh]                                                                                                                                                                                                                                                                                                                                                                             | "Protein-Tyrosine Kinases"[Mesh]  |   |   |   |
| Idiopathic Thrombocytopenic Purpura                                                                                                                                                                                                                                                                                                                                                                                       | Protein Tyrosine Kinases          |   |   |   |
| Idiopathic Thrombocytopenic Purpuras                                                                                                                                                                                                                                                                                                                                                                                      | Tyrosine-Specific Protein Kinases |   |   |   |
| Immune Thrombocytopenic Purpura                                                                                                                                                                                                                                                                                                                                                                                           | Tyrosine Specific Protein Kinases |   |   |   |
| Immune Thrombocytopenic Purpuras                                                                                                                                                                                                                                                                                                                                                                                          | Tyrosine Protein Kinase           |   |   |   |
| Immune Thrombocytopenia                                                                                                                                                                                                                                                                                                                                                                                                   | Tyrosine Kinase                   |   |   |   |
| Immune Thrombocytopenias                                                                                                                                                                                                                                                                                                                                                                                                  | Tyrosine-Specific Protein Kinase  |   |   |   |
| Thrombocytopenic Purpura, Autoimmune                                                                                                                                                                                                                                                                                                                                                                                      | Kinase, Tyrosine-Specific Protein |   |   |   |
| Werlhof Disease                                                                                                                                                                                                                                                                                                                                                                                                           | Tyrosine Specific Protein Kinase  |   |   |   |
| Werlhof's Disease                                                                                                                                                                                                                                                                                                                                                                                                         | Tyrosylprotein Kinase             |   |   |   |
| Werlhofs Disease                                                                                                                                                                                                                                                                                                                                                                                                          | Tyrosine Protein Kinases          |   |   |   |
| Autoimmune Thrombocytopenia                                                                                                                                                                                                                                                                                                                                                                                               | Protein-Tyrosine Kinase           |   |   |   |
| Autoimmune Thrombocytopenias                                                                                                                                                                                                                                                                                                                                                                                              | Protein Tyrosine Kinase           |   |   |   |
| Autoimmune Thrombocytopenic Purpura                                                                                                                                                                                                                                                                                                                                                                                       | Rilzabrutinib                     |   |   |   |
| Autoimmune Thrombocytopenic Purpuras                                                                                                                                                                                                                                                                                                                                                                                      | Fostamatinib                      |   |   |   |
| Pubmed:<br>(((((((((((("Protein-Tyrosine Kinases"[Mesh]) OR (Protein Tyrosine Kinases)) OR (Tyrosine-Specific Protein Kinases)) OR (Tyrosine Specific Protein Kinases)) OR (Tyrosine Protein Kinase)) OR (Tyrosine Kinase)) OR (Tyrosine-Specific Protein Kinase)) OR (Kinase, Tyrosine-Specific Protein)) OR (Tyrosine Specific Protein Kinase)) OR (Tyrosylprotein Kinase)) OR (Tyrosine Protein Kinases)) OR (Protein- |                                   |   |   |   |

|                                                                                                                                                                                                                                                                                                                                                                                                                                                                                                                                                                                                                                                                                                                     |
|---------------------------------------------------------------------------------------------------------------------------------------------------------------------------------------------------------------------------------------------------------------------------------------------------------------------------------------------------------------------------------------------------------------------------------------------------------------------------------------------------------------------------------------------------------------------------------------------------------------------------------------------------------------------------------------------------------------------|
| <p>Tyrosine Kinase)) OR (Protein Tyrosine Kinase)) OR (Rilzabrutinib)) OR (Fostamatinib)) AND<br/> ((((((((((((("Purpura, Thrombocytopenic, Idiopathic"[Mesh]) OR (Idiopathic Thrombocytopenic<br/> Purpura)) OR (Idiopathic Thrombocytopenic Purpuras)) OR (Immune Thrombocytopenic Purpura)) OR<br/> (Immune Thrombocytopenic Purpuras)) OR (Immune Thrombocytopenia)) OR (Immune<br/> Thrombocytopenias)) OR (Thrombocytopenic Purpura, Autoimmune)) OR (Werlhof Disease)) OR<br/> (Werlhof's Disease)) OR (Werlhofs Disease)) OR (Autoimmune Thrombocytopenia)) OR (Autoimmune<br/> Thrombocytopenias)) OR (Autoimmune Thrombocytopenic Purpura)) OR (Autoimmune<br/> Thrombocytopenic Purpuras)) ----- 162</p> |
| <p>WOS: With keywords mentioned above. ---- 130</p>                                                                                                                                                                                                                                                                                                                                                                                                                                                                                                                                                                                                                                                                 |
| <p>Ovid Embase: with keywords mentioned above. ---- 179</p>                                                                                                                                                                                                                                                                                                                                                                                                                                                                                                                                                                                                                                                         |
| <p>Clinicaltrials.gov: Tyrosine kinase + Immune thrombocytopenia</p>                                                                                                                                                                                                                                                                                                                                                                                                                                                                                                                                                                                                                                                |
